# Supplementary material for: Date Seeds Flour Used as Value-Added Ingredient for Wheat Sourdough Bread: An Example of Sustainable Bio-Recycling
Source: PubMed Central journal article supplement (PMC9062590; doi:10.3389/fmicb.2022.873432), 2022-04-18
Supplement: Presentation_1.pdf [file Presentation_1.pdf]

## Supplementary Material

### 1. Supplementary Figures

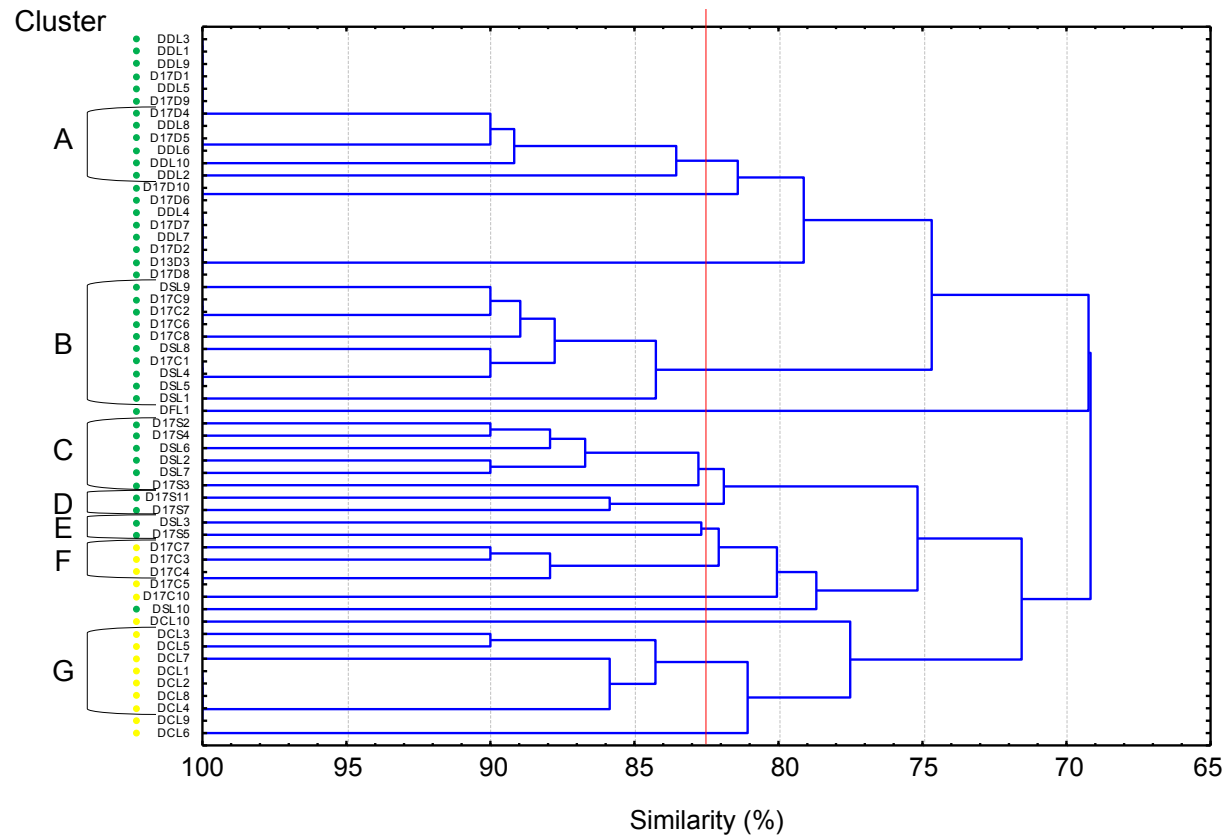

**Supplementary Figure 1.** Dendrogram of combined (primers P4, P7, and M13) RAPD profiles of lactic acid bacterium strains isolated from date seeds flour, date seeds flour dough fermented at 30 °C for 16 h, and date seeds flour type I sourdough. Cluster analysis was based on UPGMA algorithm. Clusters are indicated by capital letters A-G. Strains were identified as *Leuconostoc mesenteroides* (marked with green points) and *Lactiplantibacillus plantarum* (marked with yellow points).

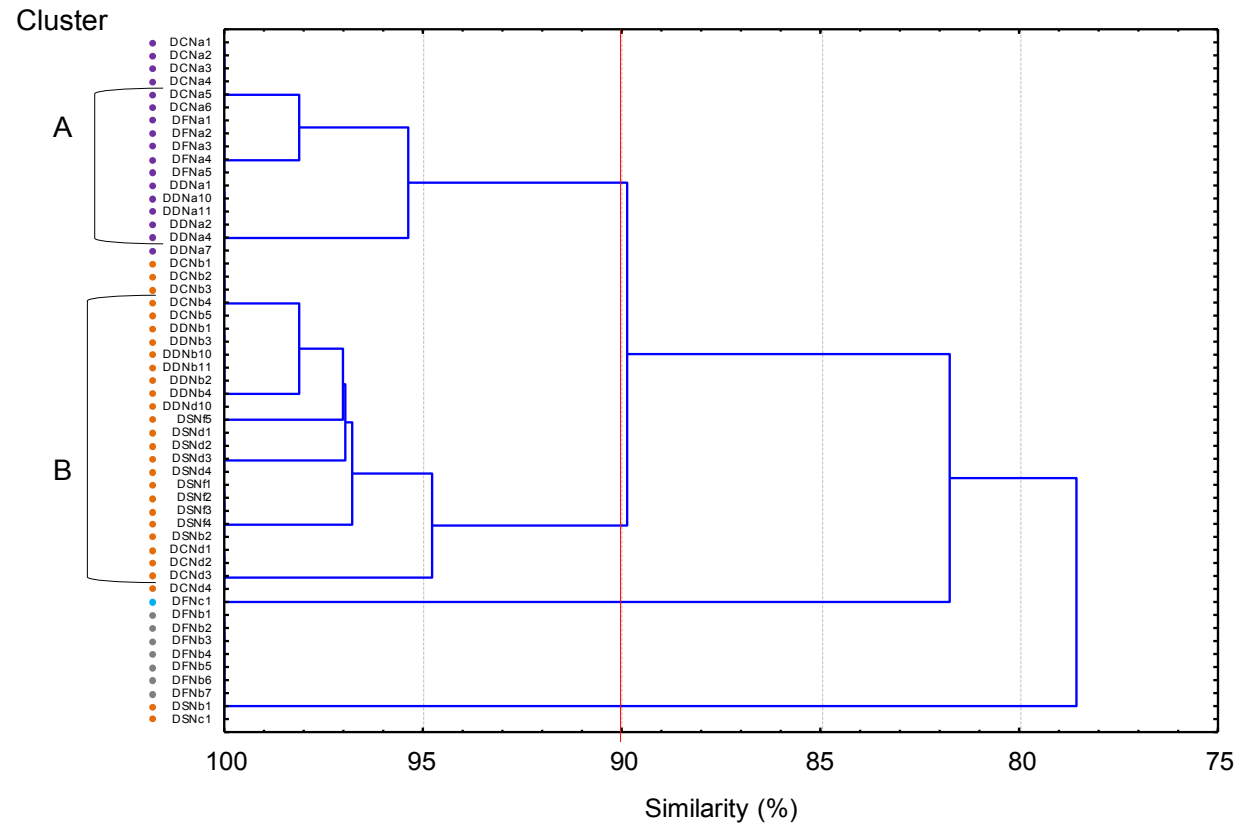

**Supplementary Figure 2.** Dendrogram of combined (primers M13m and RP11) RAPD profiles of yeast strains isolated from date seeds flour, date seeds flour dough fermented at 30 °C for 16 h, and date seeds flour type I sourdough. Cluster analysis was based on UPGMA algorithm. Clusters are indicated by capital letters A-B. Strains were identified as *Pichia kudriavzevii* (marked with violet points), *Saccharomyces cerevisiae* (marked with orange points), *Rhodotorula mucilaginosa* (marked with a cyan point), and *Wickerhamomyces subpelliculosus* (marked with gray points).

### DWF-BYB

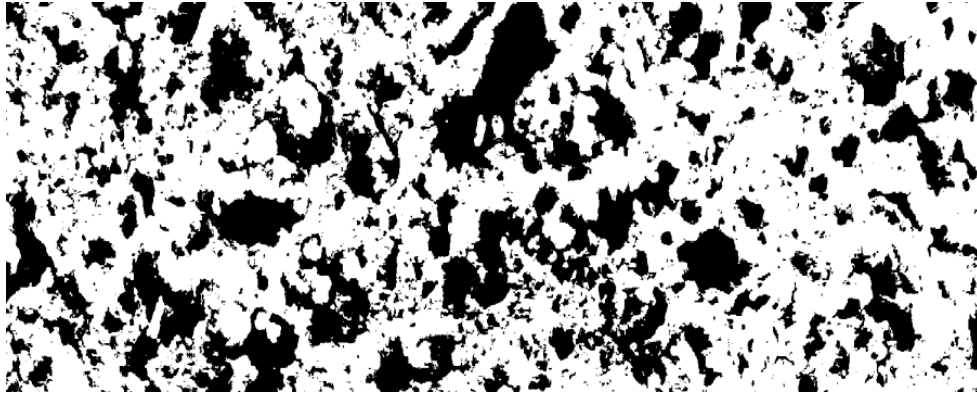

### DWF/DWF-SB

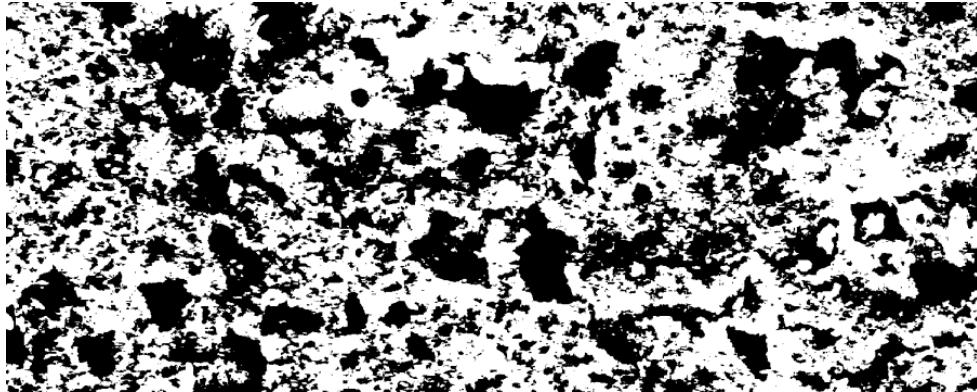

### DWF/DSF-BYB

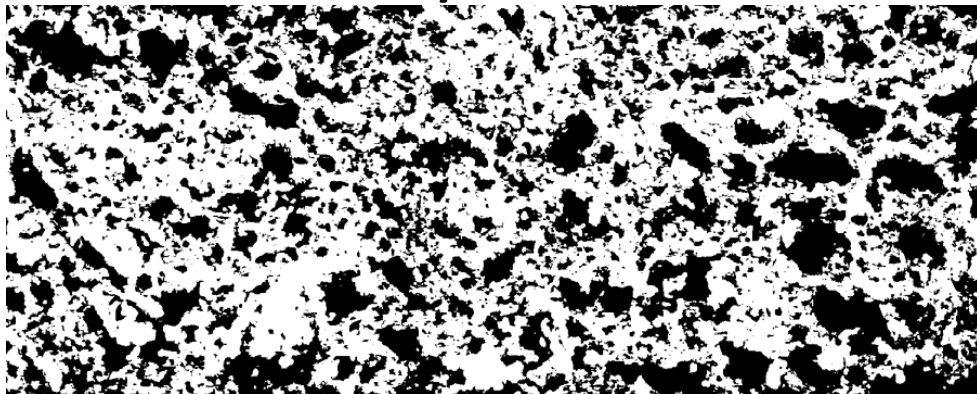

**Supplementary Figure 3.** Representative digital images of sections of durum wheat flour baker's yeast bread (DWF-BYB), durum wheat flour/date seeds flour sourdough bread (DWF/DWF-SB), and durum wheat flour/date seeds flour baker's yeast bread (DWF/DSF-BYB).
